# Supplementary material
Source: PubMed Central journal article supplement (PMC3956544)
Supplement: cc-13-482-s01.pdf [file cc-13-482-s01.pdf]

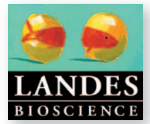

## **Supplemental Material to:**

**Stefania Capasso, Nicola Alessio, Giovanni Di Bernardo,  
Marilena Cipollaro, Mariarosa AB Melone,  
Gianfranco Peluso, Antonio Giordano,  
and Umberto Galderisi**

**Silencing of RB1 and RB2/P130 during adipogenesis  
of bone marrow stromal cells results in dysregulated  
differentiation**

**Cell Cycle 2014; 13(3)**

**<http://dx.doi.org/10.4161/cc.27275>**

**<http://www.landesbioscience.com/journals/cc/article/27275>**

**Supplemental Figure 1** - BMSC surface markers at P0.

Representative photomicrographs of BMSC at P0 stained with anti-CD73, CD90, CD105 and CD146. The cell nuclei were counterstained with Hoechst 33258 and emitted blue fluorescence. The cells emitting green fluorescence were positive for CD73 and CD90, the cells emitting red fluorescence were positive for CD146 and CD105. We used the following mouse monoclonal antibodies: Anti-CD73 antibody (clone 7G2) (Abcam, Italy); anti-CD90/Thy1 antibody (clone 5E10) (Novus Biologicals, USA); anti-CD105 antibody (clone 3A9) (Abcam, Italy); anti-CD146 Antibody (clone P1H12) (Novus Biologicals, USA). Scale bar: 10  $\mu$ M.

**Supplemental Figure 2** – Clonal commitment assay in 24 well plates

Representative photomicrographs of BMSC clones treated with adipogenic, osteogenic and chondrogenic commitment /differentiation media and stained with Oil red O, Alizarin red and Safranin O, respectively. Scale bar: 60  $\mu$ M.

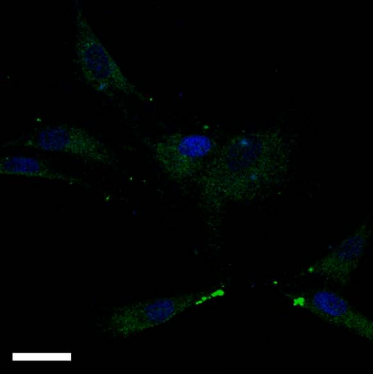

**CD73**  
**CD105**

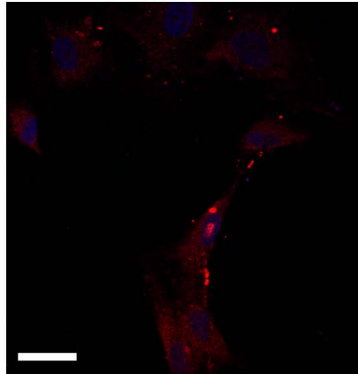

**CD146**  
**CD90**

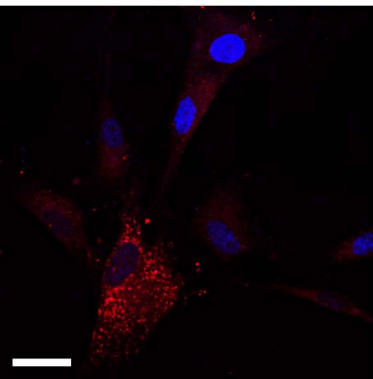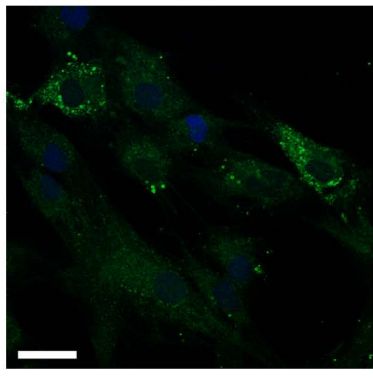

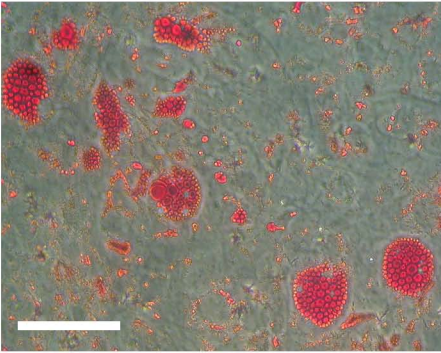

Oil Red O staining

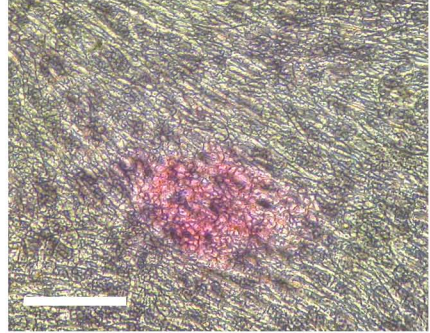

Safranin O staining

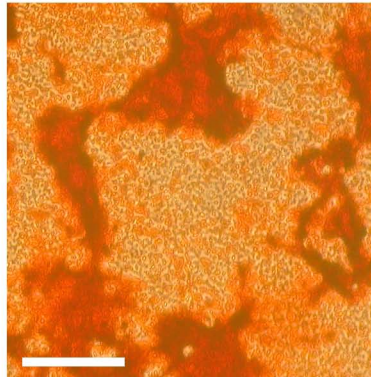

Alizarin Red staining

**CLONAL COMMITMENT ASSAY IN 24 WELL PLATES**
